# Supplementary material
Source: PubMed Central journal article supplement (PMC3406683)

## SUPPLEMENTARY MATERIAL

### FIGURE LEGENDS

**Fig. S1. Homo- or hetero-dimer formation of GBF1.** **A**, The G-box Binding Heterodimer Formation by GBF1 and HY5. Electrophoretic mobility shift assays (EMSA) using recombinant GBF1 (truncated version: 220-315 aa) and HY5 proteins bind to the G-box of *RBCS-1A* minimal promoter. Approximately 100 ng each of the proteins was mixed and incubated at 50°C for 5 min to dissociate pre-existing dimers prior to addition to radioactively labeled probe. Approximately 200 ng GST protein was added in lane 2. The protein–DNA complexes were resolved on a 4% native 0.5× TBE polyacrylamide gel. Plus and minus signs show the presence and absence of the components in respective lanes. The star indicates the heterodimer complex. **B-C**, The homodimer formation of Full Length or bZIP Domain of GBF1. In each panel of B and C, image **(a)** shows GFP channel fluorescence produced by GFP of *pCAMBIA-1302* vector, serving as a control of transformation; **(b)** shows YFP channel image produced by reconstruction of YFP; **(c)** shows respective bright-field image; and **(d)** shows merged image of (a), (b) and (c).

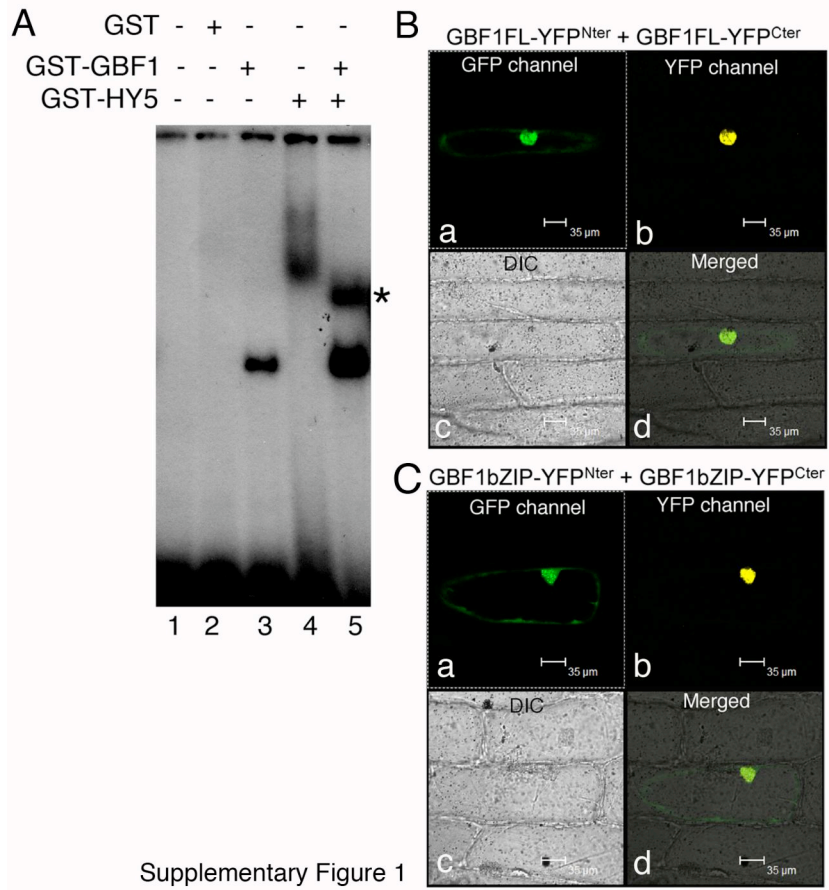

Supplement: supp_M111.333906_jbc.M111.333906-1.pdf [file supp_M111.333906_jbc.M111.333906-1.pdf]
